# Supplementary material
Source: PubMed Central journal article supplement (PMC3931450)
Supplement: NIHMS551788-supplement-01.pdf [file NIHMS551788-supplement-01.pdf]

**Table S1**

Description of variables included in PCA analysis

| Behaviour                      | Description                                                                           | Coding    |
|--------------------------------|---------------------------------------------------------------------------------------|-----------|
| <b>Back of cage</b>            | Monkey was positioned in back 1/3 of cage                                             | Point (1) |
| <b>Front of cage</b>           | Monkey was positioned in front 1/3 of cage                                            | Point (1) |
| Middle of cage                 | Monkey was positioned in middle 1/3 of cage                                           | Point (1) |
| Attention to others            | Attention of monkey, as evaluated by eyes, was focused on conspecifics                | Point (2) |
| Attention to tester            | Attention of monkey, as evaluated by eyes, was focused on observer                    | Point (2) |
| Back to tester                 | Monkey was turned with back to tester                                                 | Point (2) |
| <b>Ignore</b>                  | Attention of monkey, as evaluated by eyes, was ignoring the observer and conspecifics | Point (2) |
| <b>Lean or approach tester</b> | Monkey leaned or moved towards the observer, but did not lunge                        | Point (2) |
| <b>Lunge</b>                   | Monkey lunged at observer                                                             | Point (2) |
| Move away                      | Monkey leaned or moved away from observer                                             | Point (2) |
| Crouch                         | Monkey was crouched                                                                   | Point (3) |
| Lie                            | Monkey was lying on floor of cage                                                     | Point (3) |
| Locomote                       | Monkey was moving around cage                                                         | Point (3) |
| Sit                            | Monkey was sitting on floor of the cage                                               | Point (3) |
| Stand on two legs              | Monkey was standing on hindlegs (without locomoting)                                  | Point (3) |
| Stand on three or four legs    | Monkey was standing on three or four legs (without locomoting)                        | Point (3) |
| Grunt                          | Monkey grunted                                                                        | Point (4) |

---

|                           |                                                                                                                                          |           |
|---------------------------|------------------------------------------------------------------------------------------------------------------------------------------|-----------|
| LEN to other monkey       | Monkey produced 'LEN' facial expression (Lips forward, Ears back, Neck extended), directed towards a conspecific                         | Point (4) |
| LEN to tester             | Monkey produced LEN towards observer                                                                                                     | Point (4) |
| Lipsmack to other monkey  | Monkey showed lipsmack towards conspecific                                                                                               | Point (4) |
| <b>Lipsmack to tester</b> | Monkey showed lipsmack towards observer                                                                                                  | Point (4) |
| <b>Open mouth</b>         | Monkey showed open mouth                                                                                                                 | Point (4) |
| <b>Quiet face</b>         | Monkey showed quiet face (mouth closed, no lip or jaw movement)                                                                          | Point (4) |
| <b>Grimace</b>            | Whether or not monkey showed fear grimace to observer                                                                                    | One-zero  |
| <b>Shriek</b>             | Whether or not monkey shrieked                                                                                                           | One-zero  |
| Grind teeth               | Whether or not monkey ground teeth, without eating                                                                                       | One-zero  |
| <b>Threat</b>             | Whether or not monkey made a threat display (open-mouth threat, lunge and/or stamping foot with eye contact) to observer or conspecifics | One-zero  |
| <b>Reach</b>              | Whether or not monkey reached out of the cage                                                                                            | One-zero  |
| Avert gaze                | Whether or not monkey averted gaze from observer (direction of gaze moved away from observer as observer directed eyes towards monkey)   | One-zero  |
| Food                      | Whether or not monkey consumed food                                                                                                      | One-zero  |
| Groom                     | Whether or not monkey self-groomed                                                                                                       | One-zero  |
| Object                    | Whether or not monkey manipulated an object on or in the cage                                                                            | One-zero  |
| Scratch                   | Whether or not monkey scratched itself                                                                                                   | One-zero  |
| Shake body                | Whether or not monkey shook its body                                                                                                     | One-zero  |
| Shake cage                | Whether or not monkey shook cage                                                                                                         | One-zero  |
| Urinate                   | Whether or not monkey urinated                                                                                                           | One-zero  |
| Yawn                      | Whether or not monkey yawned                                                                                                             | One-zero  |

---

Coding is described as either ‘point’ (behaviour recorded once per minute at a specified time; instantaneous sampling) or ‘one-zero’ (tester recorded whether or not behaviour occurred any time in the past minute). Point score variables involved (1) cage position, (2) degree and type of responsiveness to the observer or other monkeys, (3) posture/locomotion and (4) facial/vocal expression. These categories were scored on the 15, 30, 45 or 60 s interval, respectively. Related point score variables are grouped together by number in the Coding column. All scores range from 0 to 4. The behaviours listed in bold significantly contributed to personality components used in this study (see Sussman, Ha, Bentson, & Crockett, 2013, for details on inclusion criteria).

## **References**

Sussman, A.F., Ha, J.C., Bentson, K.L., & Crockett, C.M. (2013). Temperament in rhesus, long-tailed, and pigtailed macaques varies by sex and species. *American Journal of Primatology*, 75(4), 303–313.
